# Supplementary material for: LC-MS/MS identification and cytotoxic assessment of jaspamide and its congeners from the sponge Jaspis diastra
Source: Royal Society of Chemistry journal article supplement (doi:10.1039/d3nj00459g), 2023-01-01
Supplement: d3nj00459g1.pdf [file d3nj00459g1.pdf]

### Supporting information

New Journal of Chemistry

#### LC-MS/MS identification and cytotoxic assessment of jaspamide and its congeners from the sponge *jaspis diastra*

Avin Ramanjooloo, Mahmoud Kamel, Samson A. Adeyemi, Philemon Ubanako, Bertrand Baudot, Asho D. Thakoor, Yahya E. Choonara, Archana Bhaw-Luximon\*

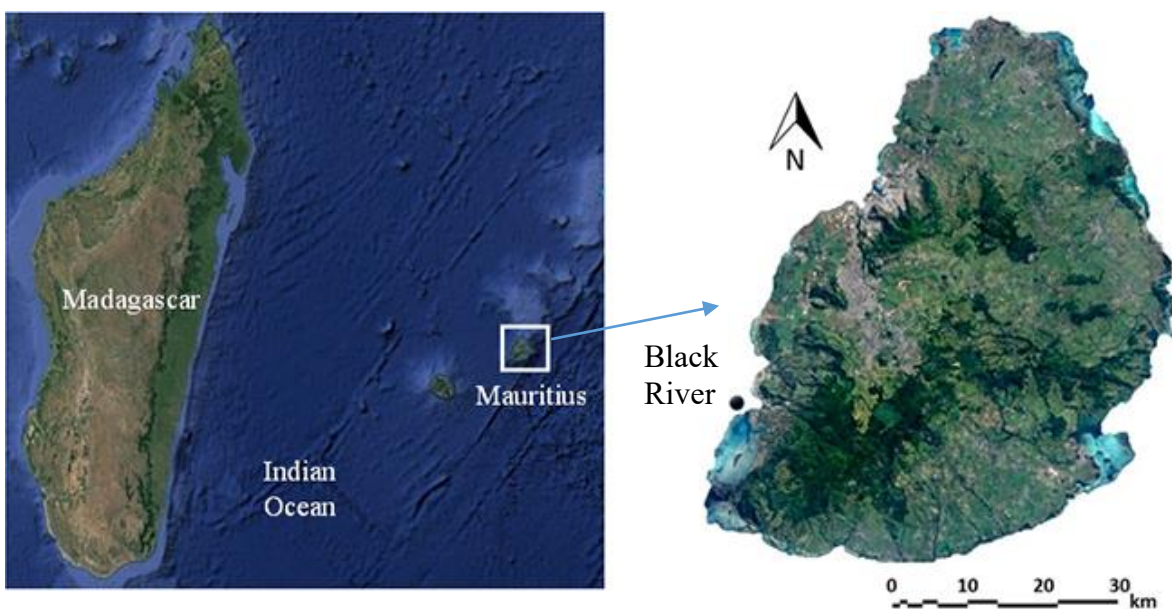

Fig. 1S. Map showing collection site of *Jaspis diastra* in Mauritius waters

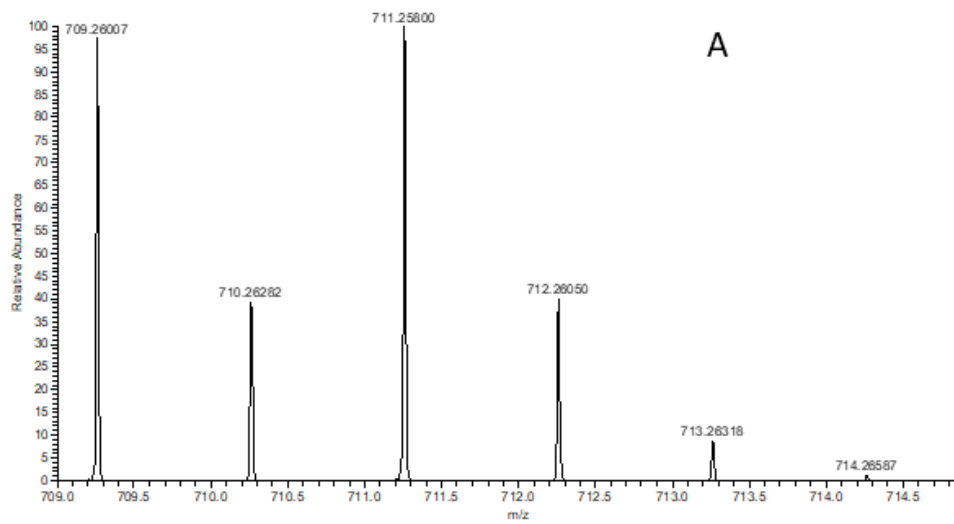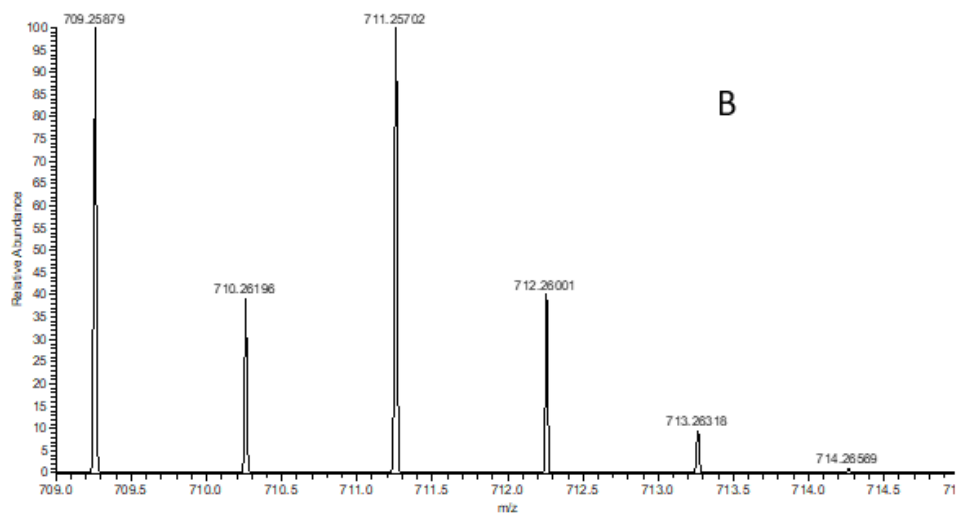

Fig 2S. Comparison of the isotope pattern of reference Jaspamide (1) (A) with its measured pattern (B) in JDH-1.

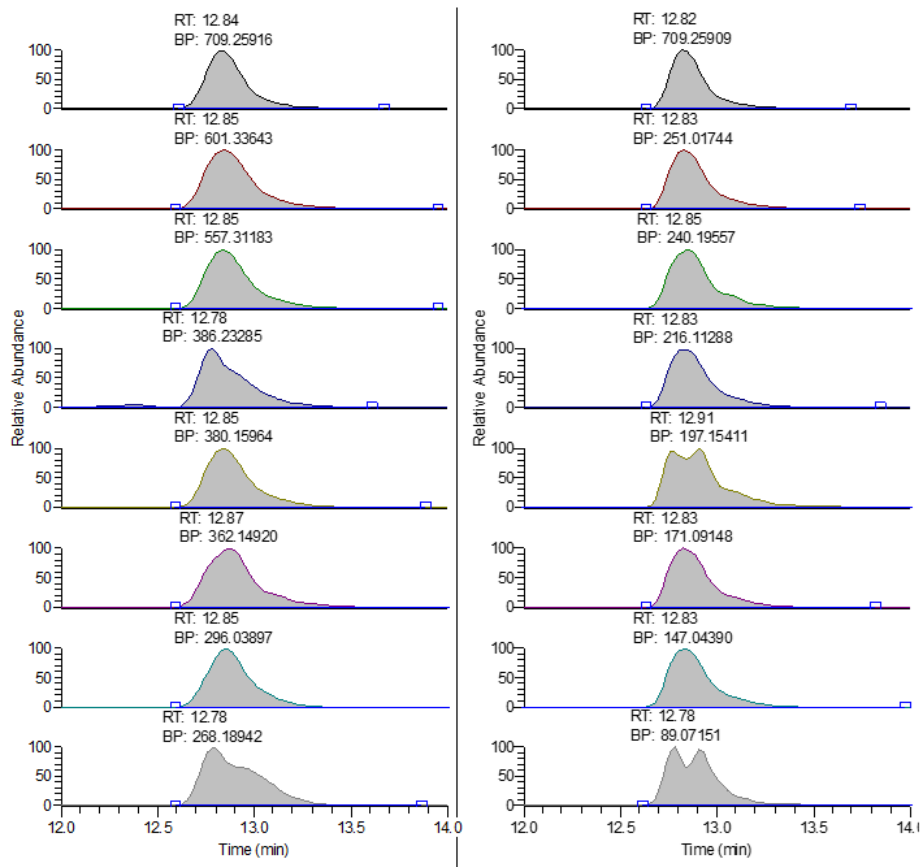

Fig 3S. EICs of fragments of reference Jaspamide (1)

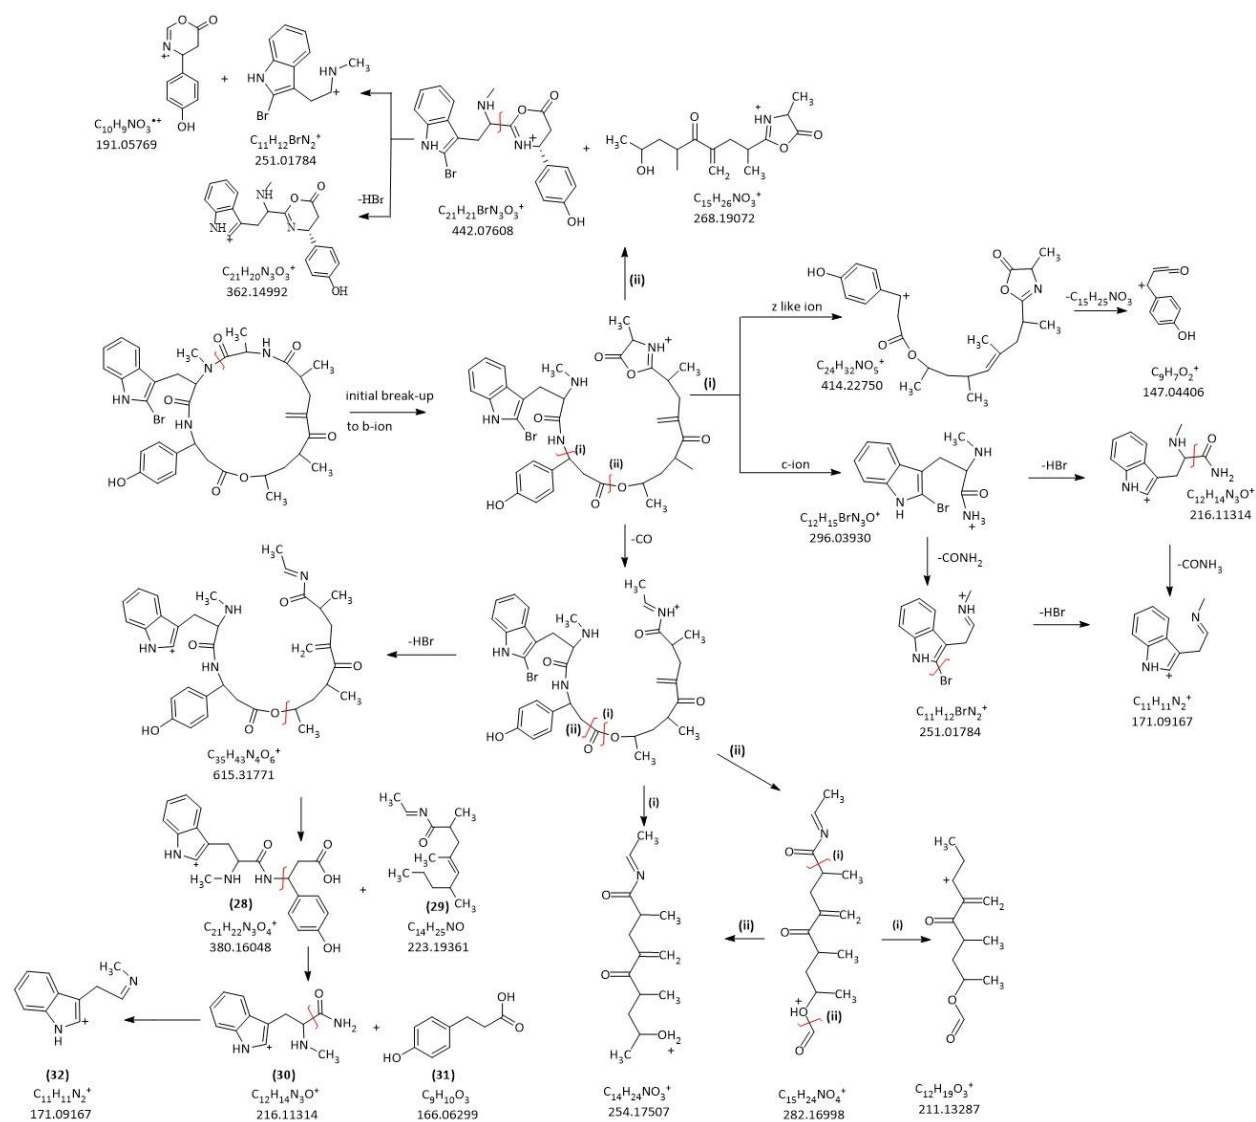

Fig 4S. Proposed fragmented pathways of Jaspamide B



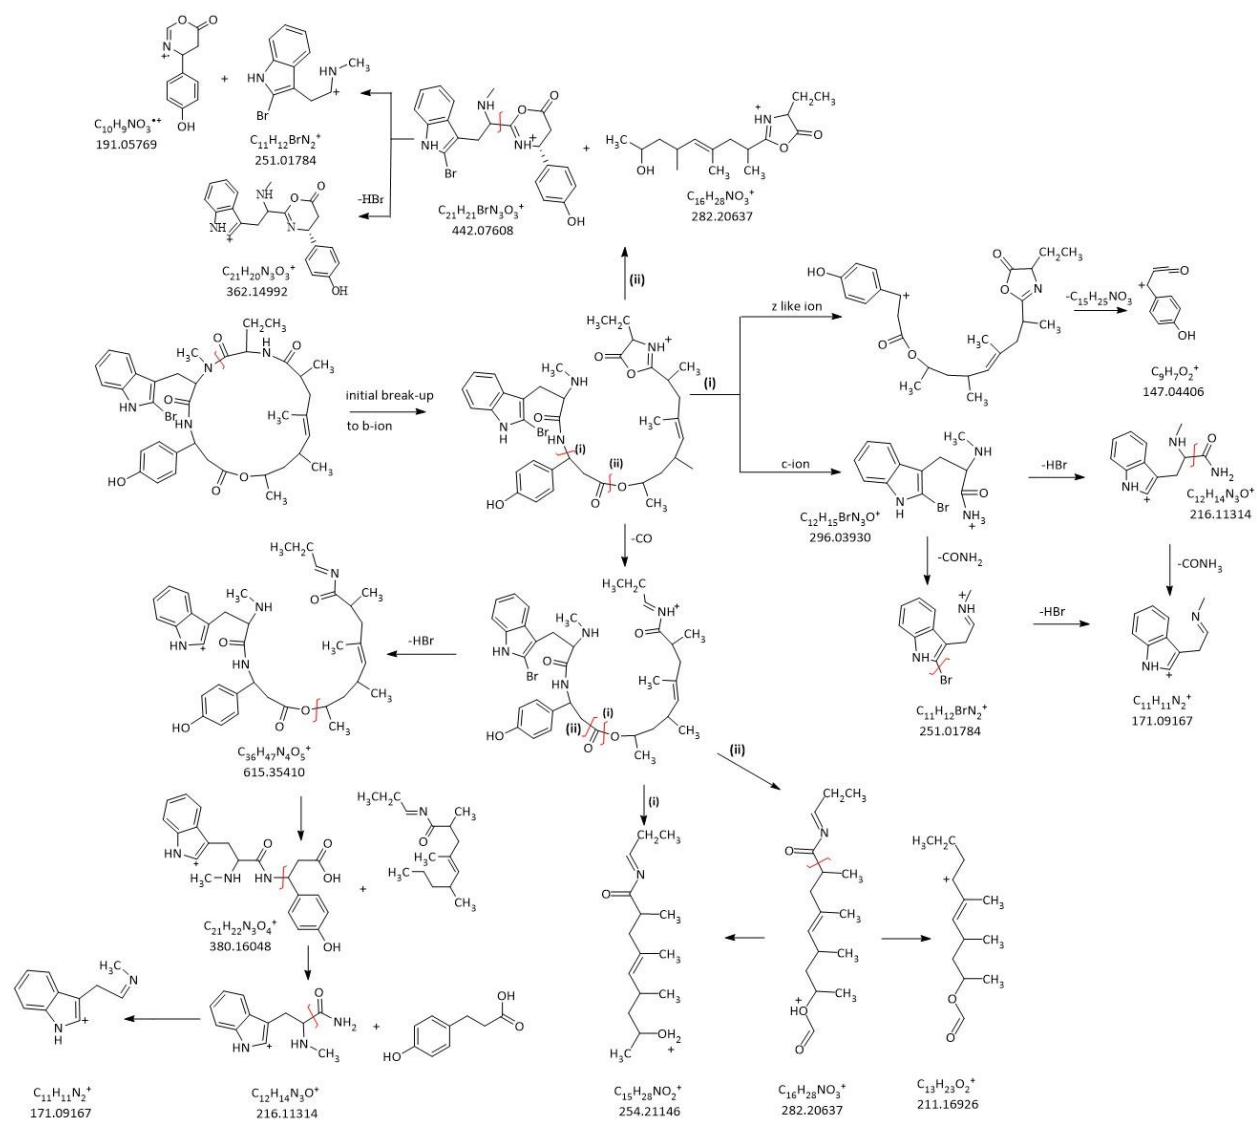

Fig 6S. Proposed fragmented pathways of Jaspamide D







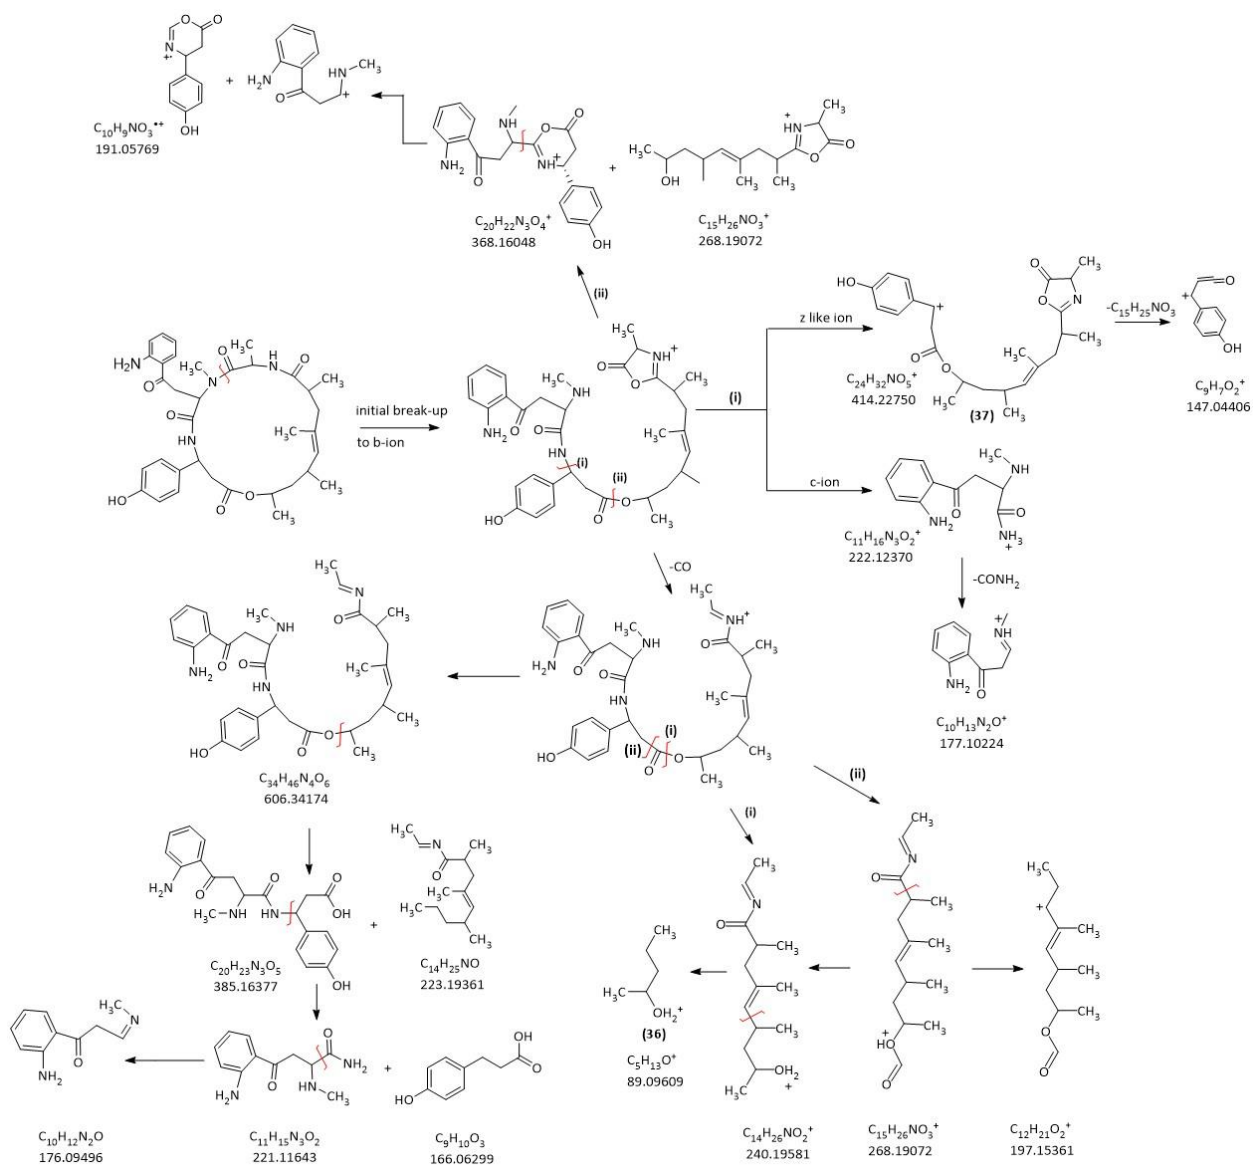

Fig 9S. Proposed fragmented pathways of Jaspamide O

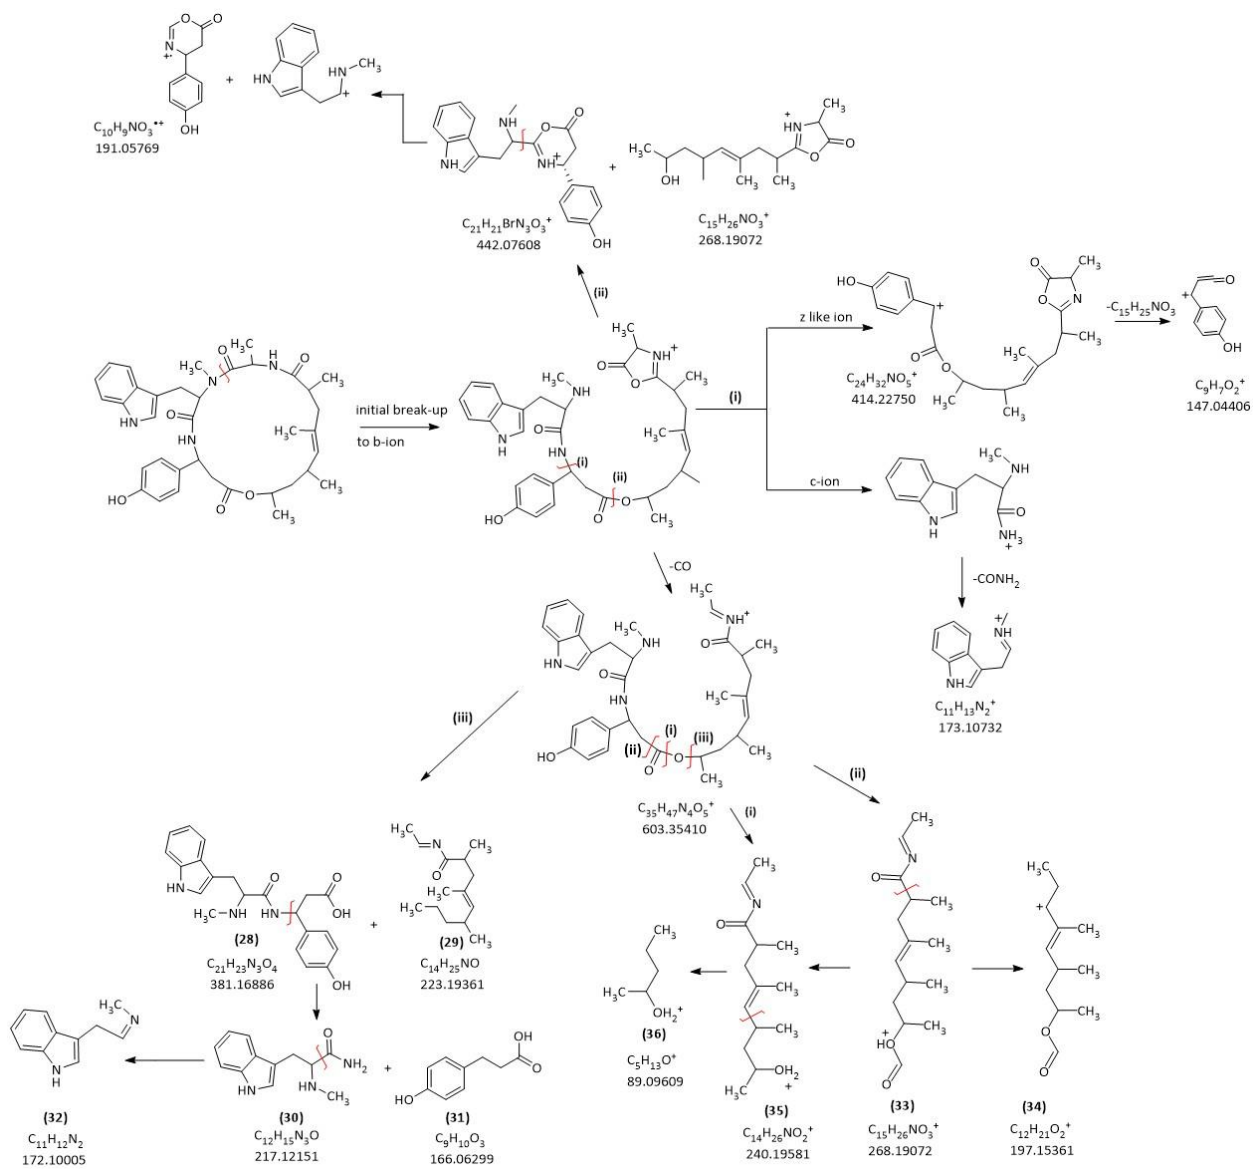

Fig 10S. Proposed fragmented pathways of Jaspamide Q

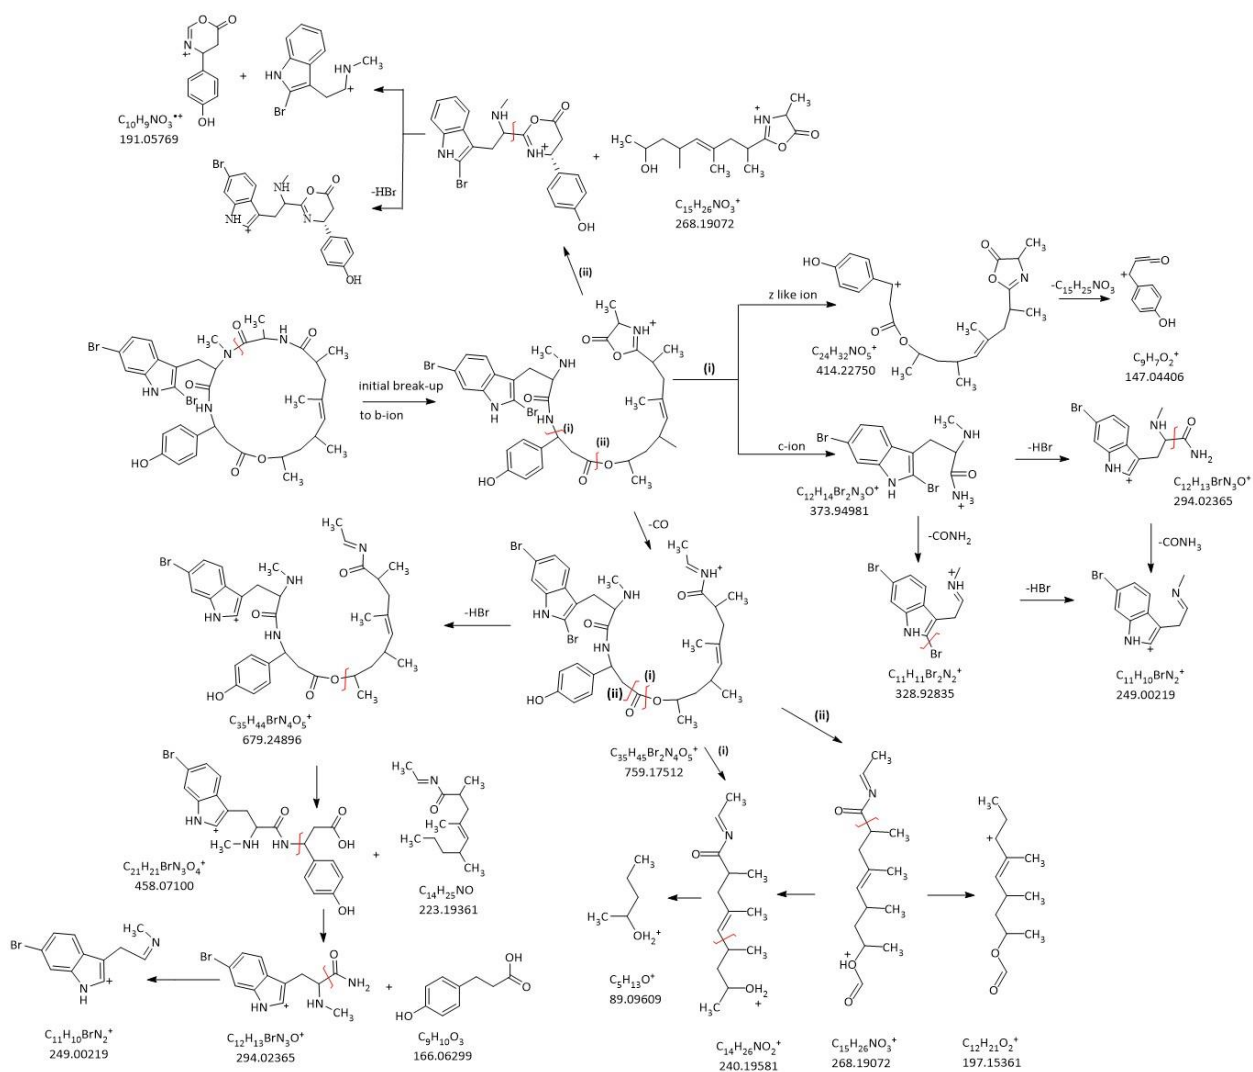

Fig 11S. Proposed fragmented pathways of Jaspamide R

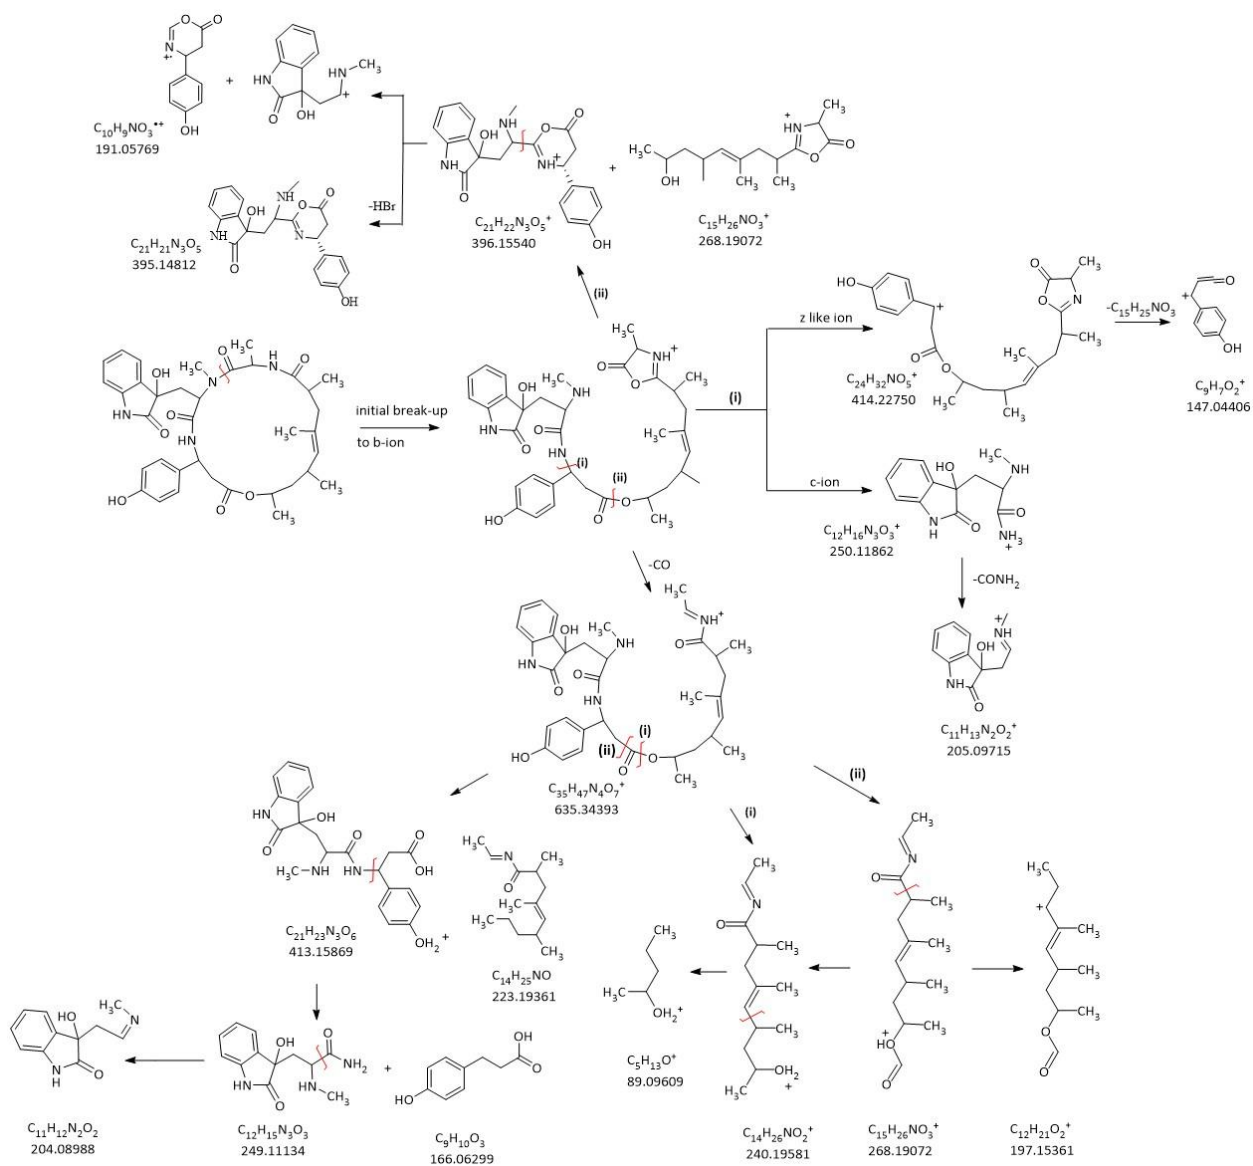

Fig 12S. Proposed fragmented pathways of Jaspamide S

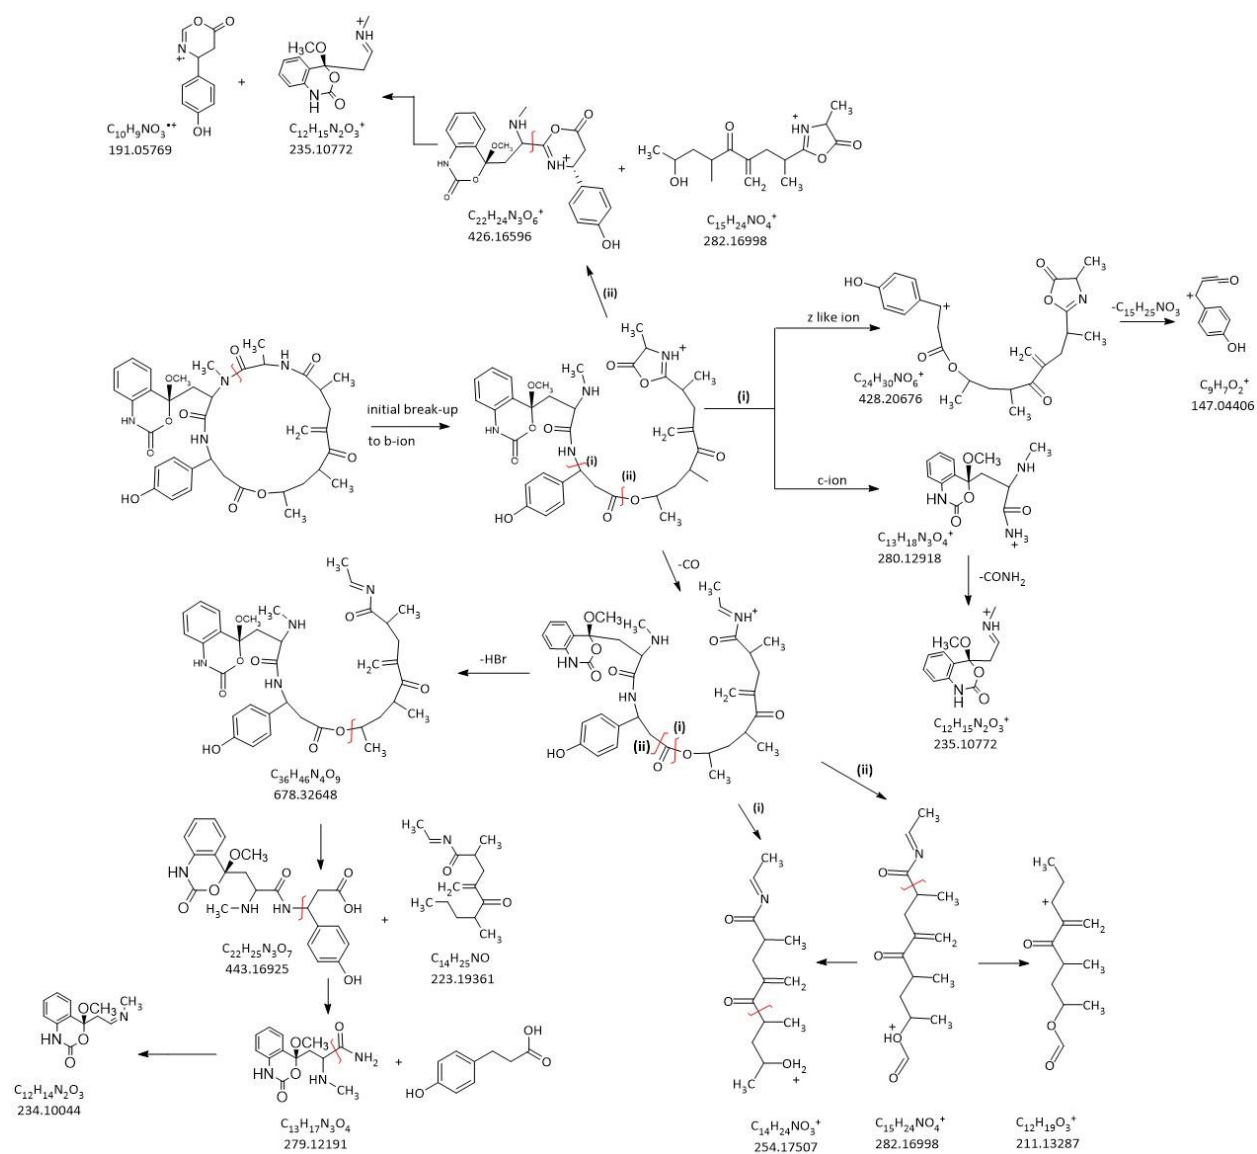

Fig 13S. Proposed fragmented pathways of Jaspamide U

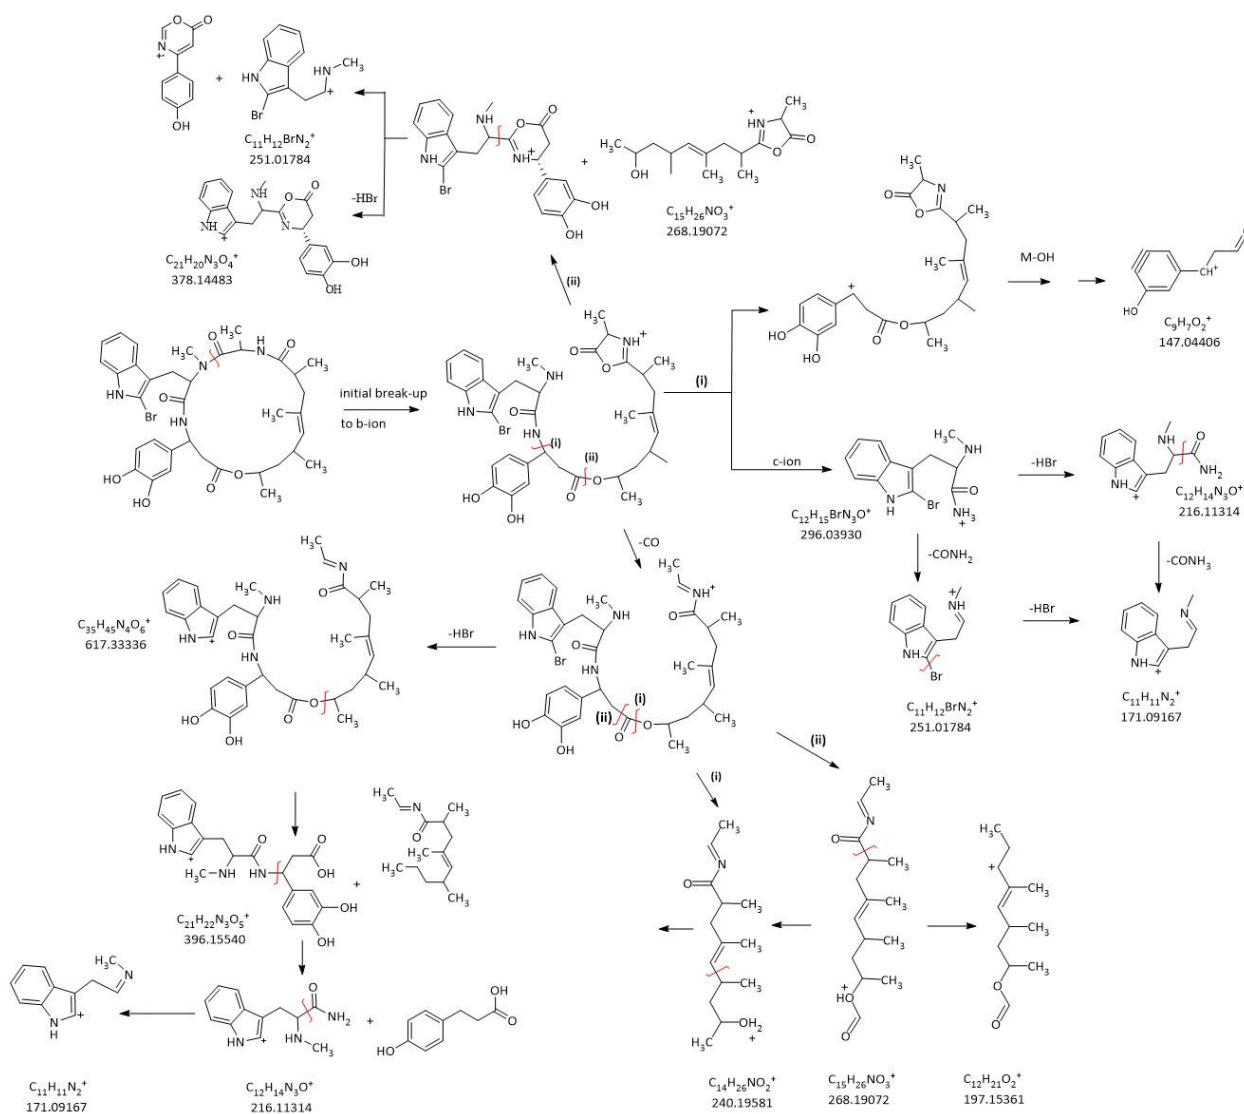

Fig 14S. Proposed fragmented pathways of Jaspamide V

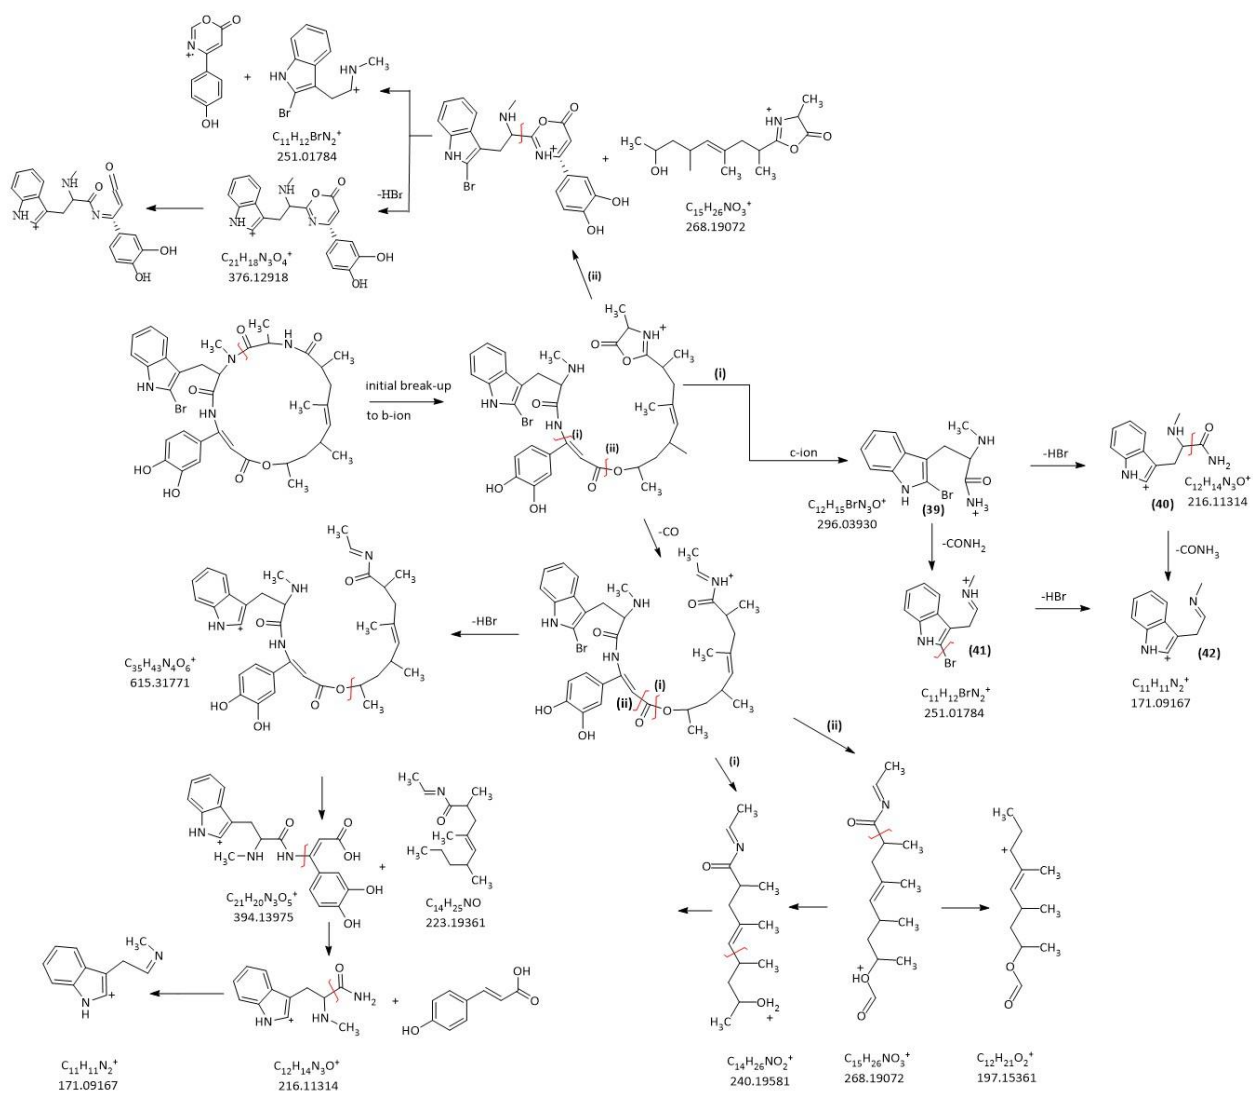

Fig 15S. Proposed fragmented pathways of Jaspamide W





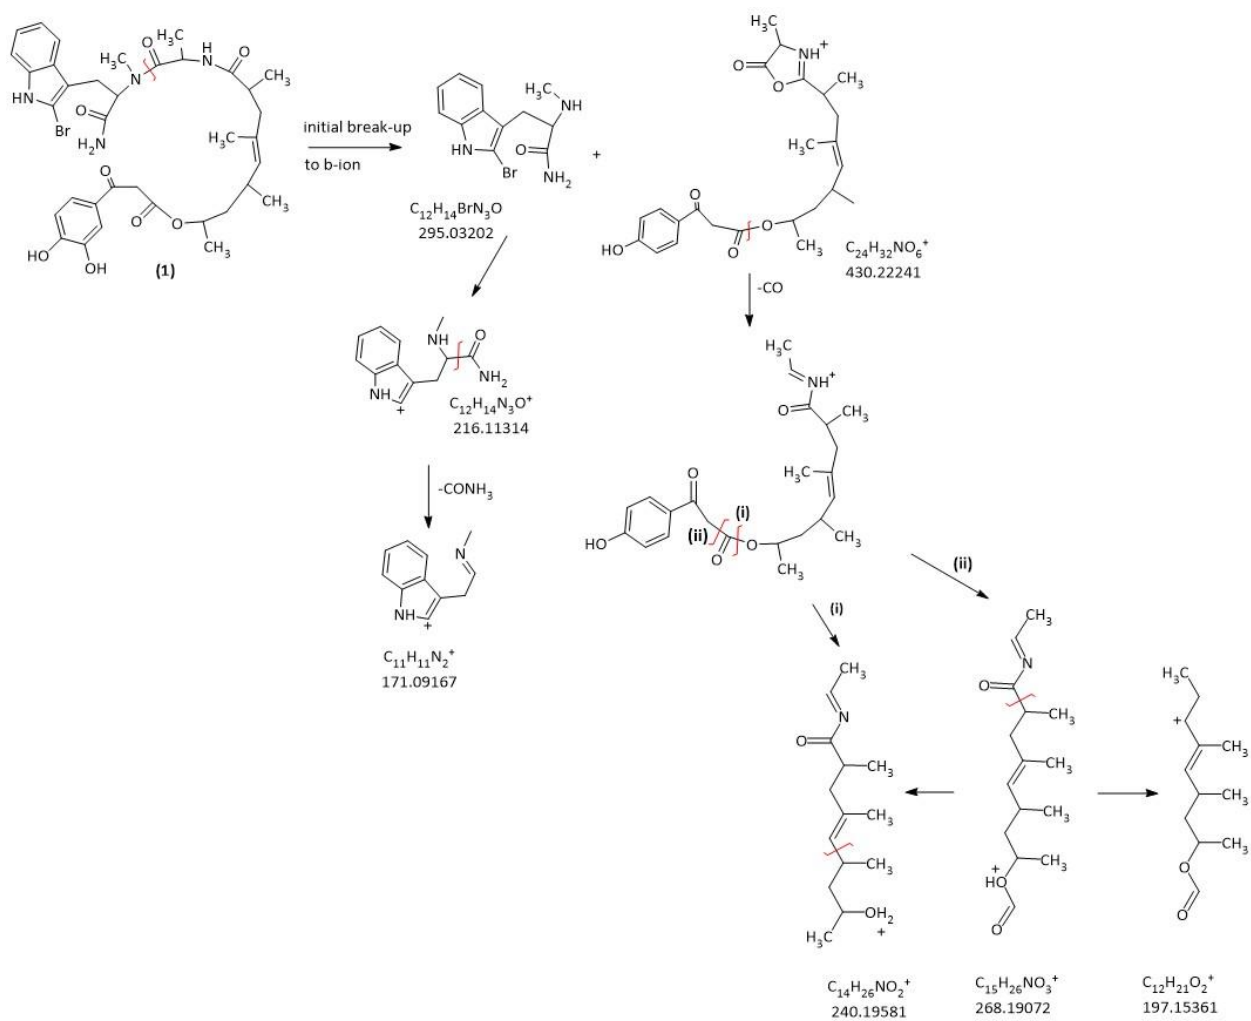

Fig 18S. Proposed fragmented pathways of Jaspamide Z5

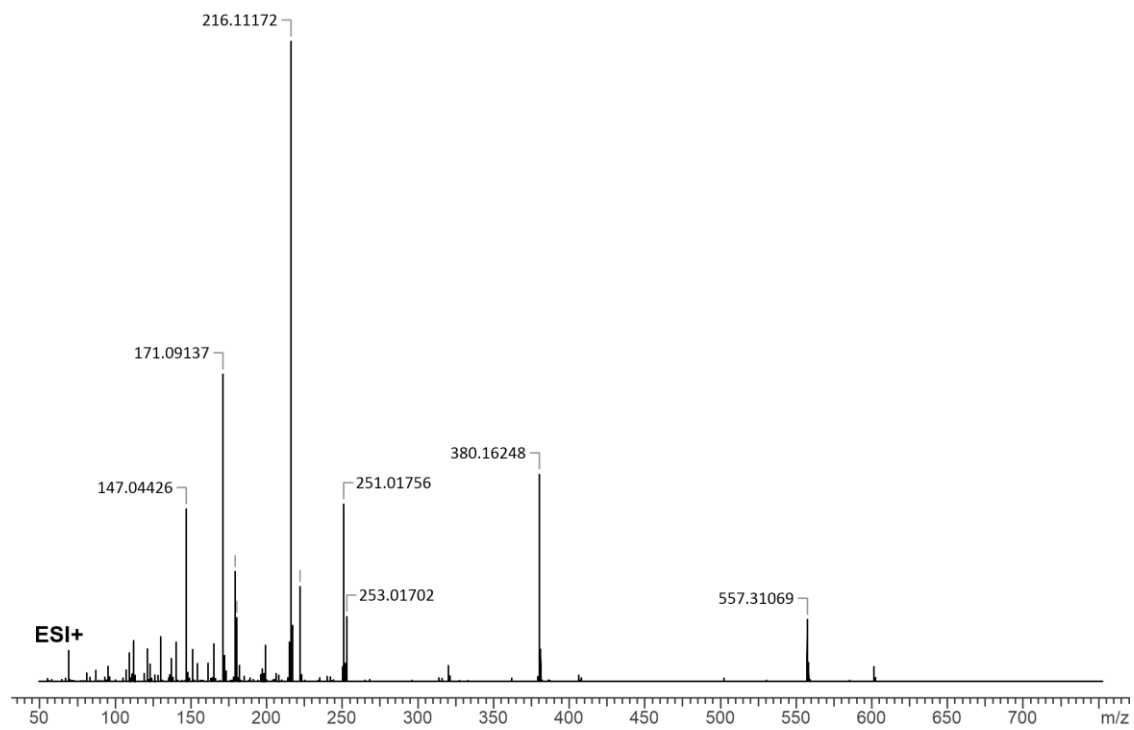

Fig 19S. MS/MS spectrum of Jaspamide (1) in JDH-1

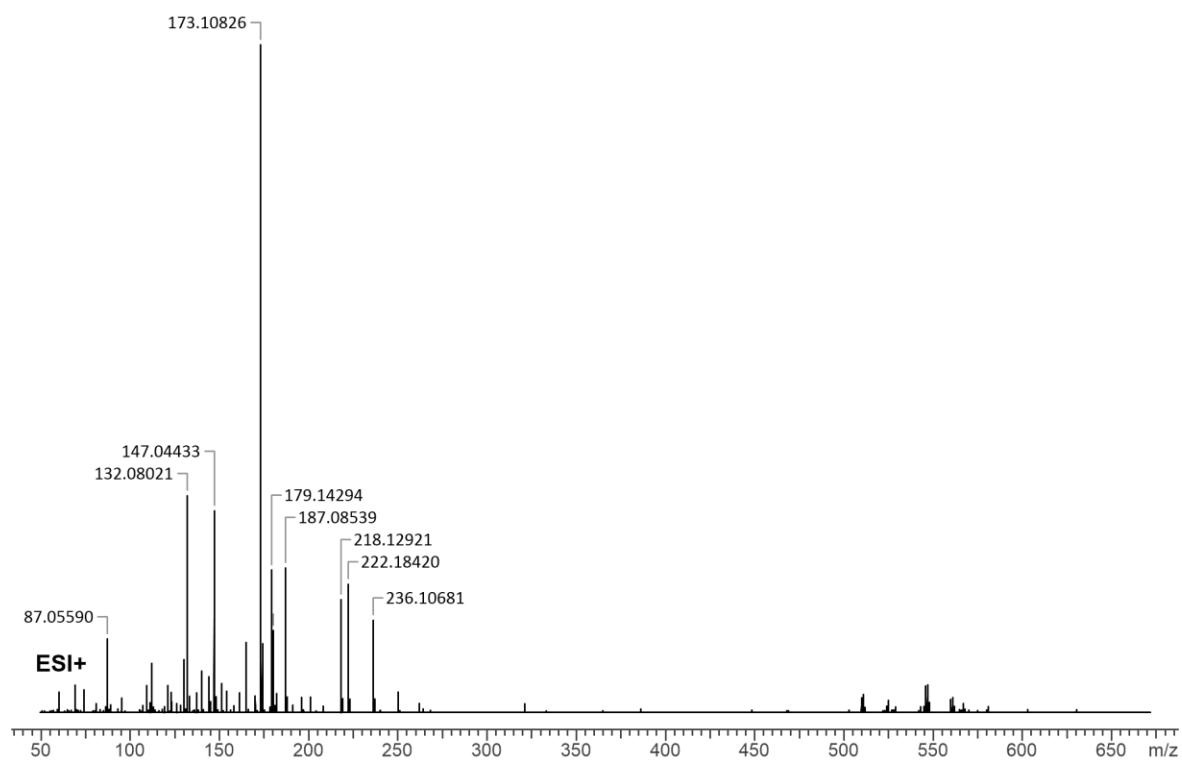

Fig 20S. MS/MS spectrum of Jaspamide Q in JDH-1

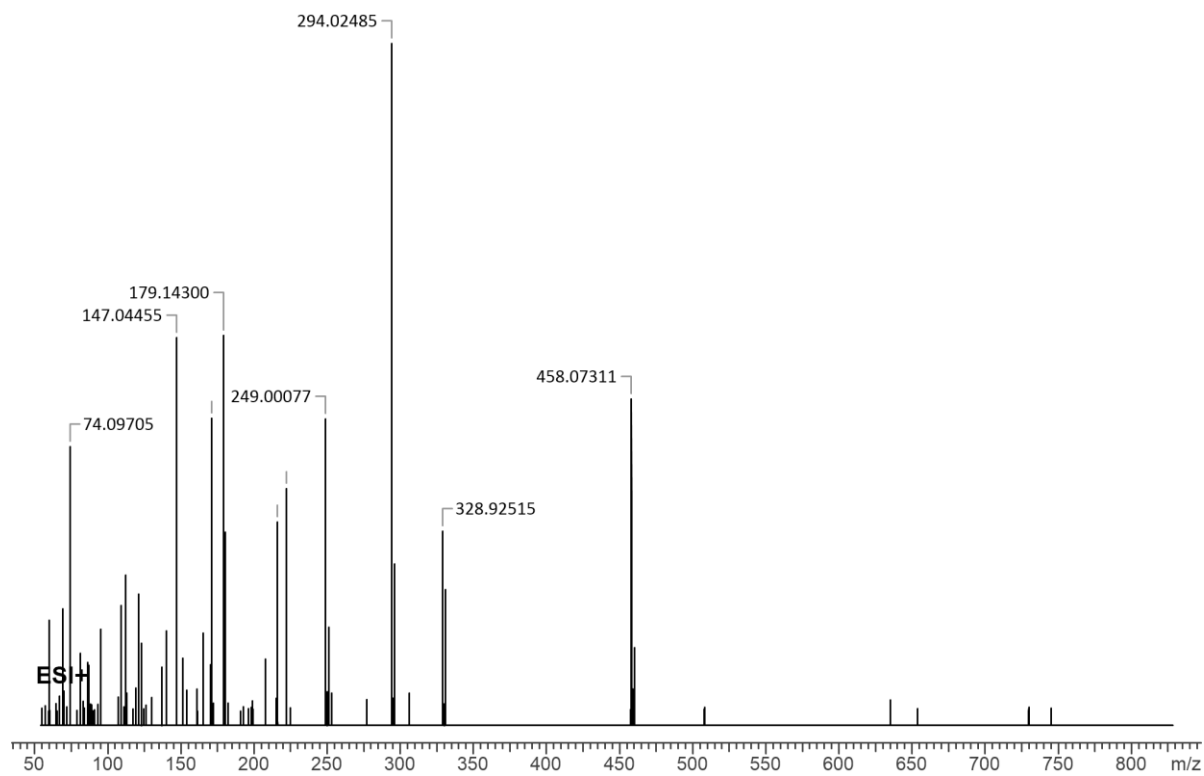

Fig 21S. MS/MS spectrum of Jaspamide R in JDH-1

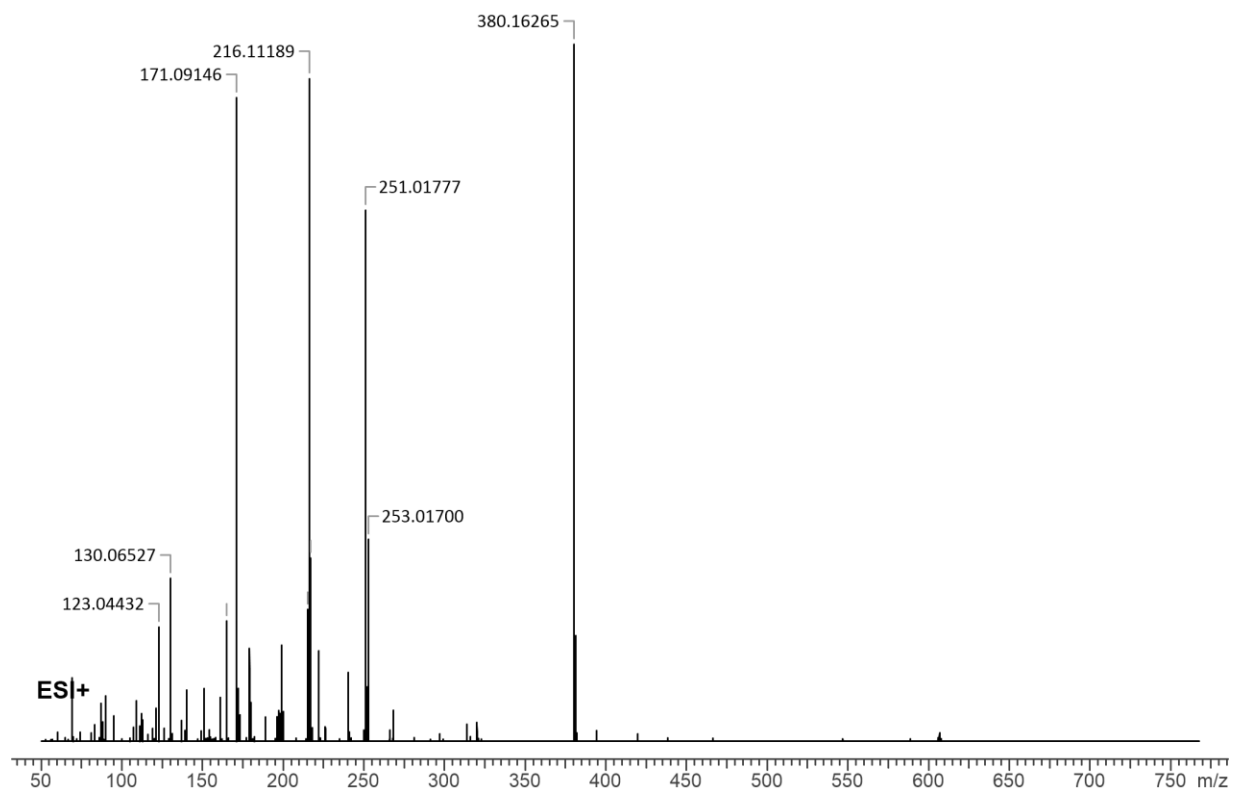

Fig 22S. MS/MS spectrum of Jaspamide Z1 in JDH-1



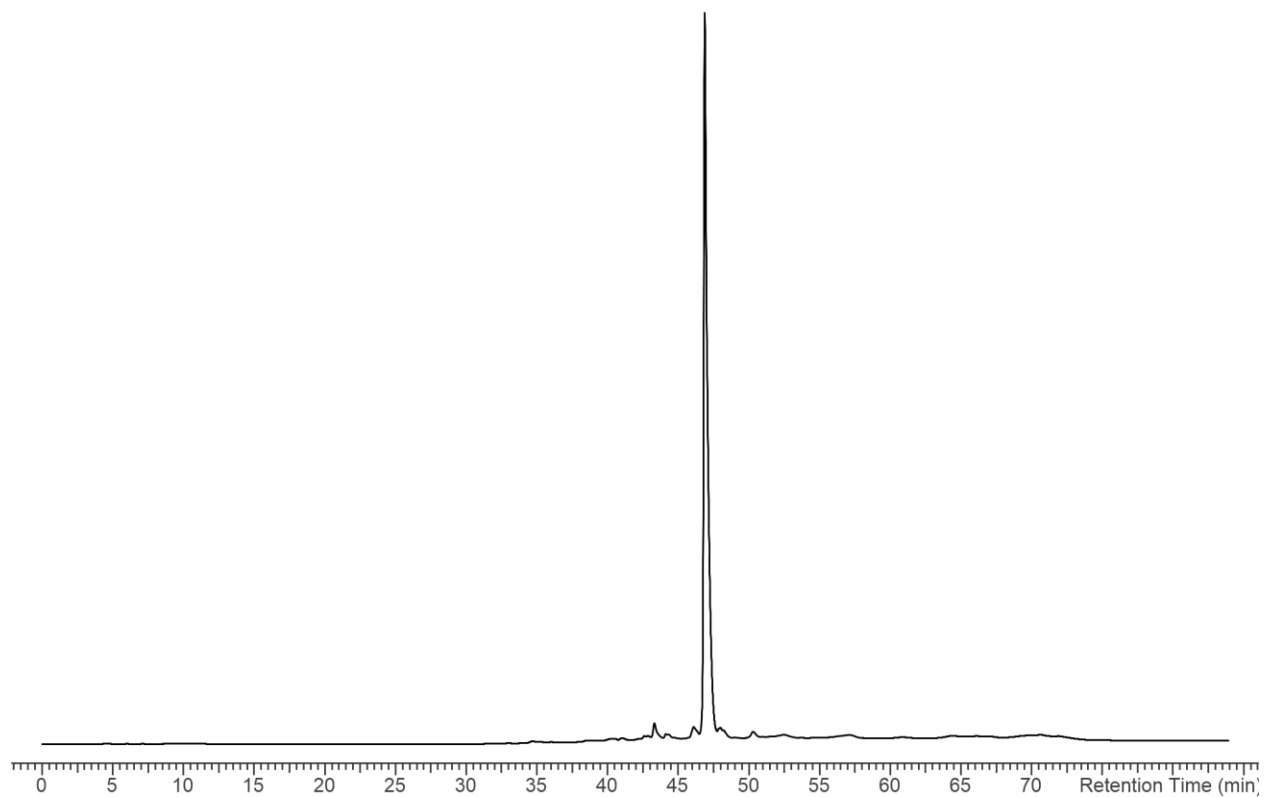

Figure 25S. HPLC chromatogram of JC-1

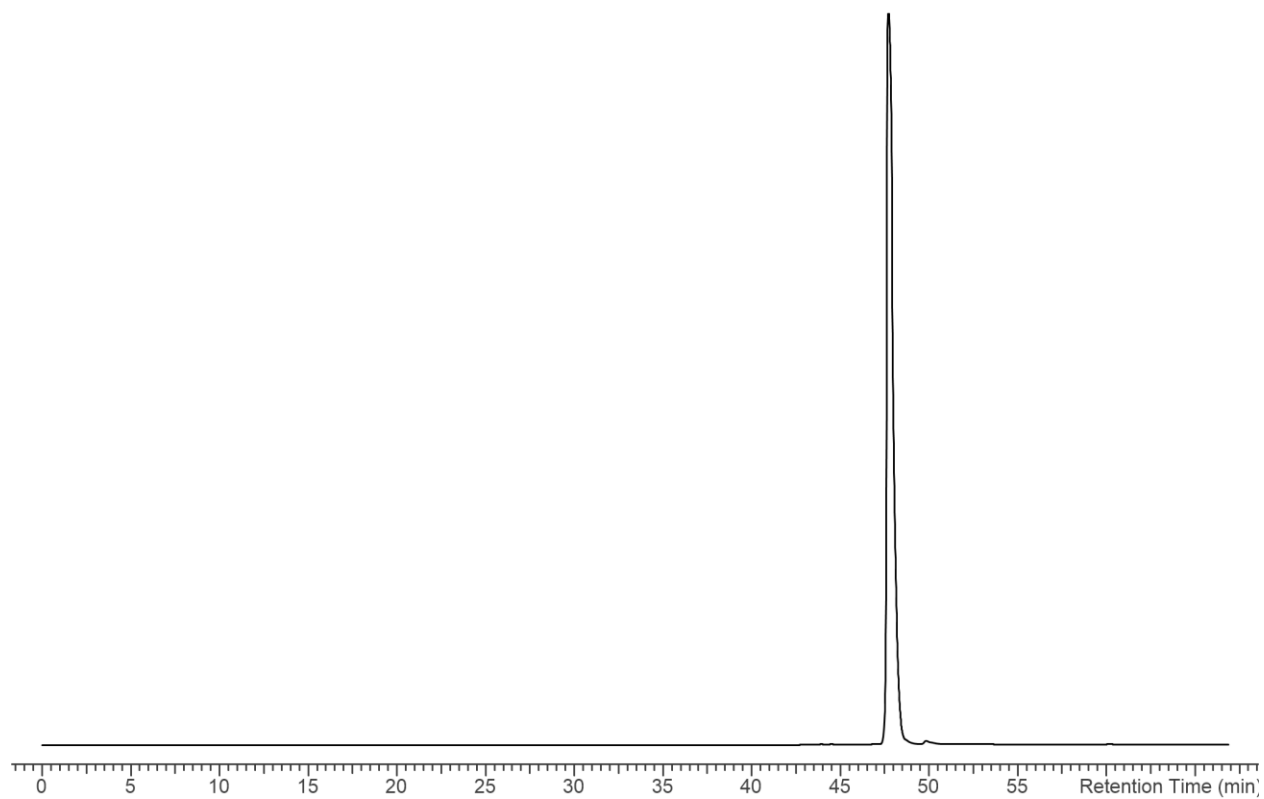

Figure 26S. HPLC chromatogram of JC-1P (purified Jaspamide)

Table 1S. Theoretical and measured isotope pattern of Jaspamide (1) and its congeners

| <b>Jaspamide (1) and its congeners</b> | <b>Theoretical isotope pattern</b>                                                                                                            | <b>Measured isotope pattern</b>                                                        |
|----------------------------------------|-----------------------------------------------------------------------------------------------------------------------------------------------|----------------------------------------------------------------------------------------|
| Jaspamide (1)                          | 709.25506, 710.24965, 711.25301, 712.25636, 713.25972, 714.26061, 715.26396, 716.26732, 717.27067, 718.27156                                  | 709.25934, 710.26257, 711.25745, 712.26062, 713.26251, 714.26575, 715.46820            |
| B/G/W                                  | 723.23432, 724.22892, 725.23227, 726.23563, 727.23898, 728.23987, 729.24323, 730.24658, 731.24994, 732.25083                                  | 723.23846, 724.53748, 725.23227, 726.28741, 729.19141, 730.36780, 732.07013            |
| C/E/K/L/N/V                            | 725.25444, 726.25779, 727.25239, 728.25575, 729.25910, 730.26246, 731.26335, 732.26670, 733.27006, 734.27314, 735.27430                       | 725.25470, 727.25226, 728.70313, 729.65717                                             |
| D                                      | 723.27517, 724.27853, 725.27313, 726.27648, 727.27984, 728.28319, 729.28408, 730.28744, 731.29079, 732.29415, 733.29504                       | 723.27557, 724.27789, 725.27252, 726.28613, 728.28412, 729.28687                       |
| F/H/J/M                                | 695.24387, 696.24723, 697.24183, 698.24518, 699.24854, 700.25189, 701.25278, 702.25614, 703.25949, 704.26285, 705.26374                       | 695.24353, 696.24670, 697.55695                                                        |
| O                                      | 635.34393, 636.34728, 637.35064, 638.35399, 639.35488, 640.35824, 641.36159, 642.36248, 643.36584                                             | 635.34430, 639.91980, 642.40503                                                        |
| P                                      | 693.34941, 694.35276, 695.35612, 696.35947, 697.36036, 698.36372, 699.36707, 700.36796, 701.37132, 702.37467                                  | 693.44653, 697.45563, 698.45447, 700.43042, 701.38837, 702.94000                       |
| Q                                      | 631.34901, 632.35237, 633.35572, 634.35908, 635.35997, 636.36332, 637.36668, 638.37003, 639.37092                                             | 631.34778, 632.35297                                                                   |
| R                                      | 787.17004, 788.17339, 789.16799, 790.17134, 791.16594, 792.16930, 793.17265, 794.17601, 795.17690, 796.18025, 797.18361, 798.18696, 799.18785 | 787.17010, 789.16827, 790.17120, 791.16663, 792.17151, 793.41370, 794.81537, 798.58917 |
| S                                      | 663.33884, 664.34220, 665.34555, 666.34891, 667.34980, 668.35315, 669.35651, 670.35740, 671.36075, 672.36411                                  | 663.33856, 664.34021, 671.46448, 672.52258                                             |
| U                                      | 707.32867, 708.33202, 709.33538, 710.33873, 711.33963, 712.34298, 713.34634, 714.34723, 715.35058, 716.35394                                  | 707.33136, 708.33240, 709.91211, 711.28094, 712.87341, 714.26752, 716.89777            |

|                                |                                                                                                                                  |                                                                                                                       |
|--------------------------------|----------------------------------------------------------------------------------------------------------------------------------|-----------------------------------------------------------------------------------------------------------------------|
| Z <sub>1</sub>                 | 727.27009, 728.27344, 729.26804,<br>730.27140, 731.27475, 732.27811,<br>733.27900, 734.28235, 735.28571,<br>736.28906, 737.28995 | 727.27020, 728.27319, 729.26819,<br>730.27179, 731.27466                                                              |
| Z <sub>4</sub>                 | 563.22274, 564.22610, 565.22070,<br>566.22405, 567.22741, 568.23076,<br>569.23165, 570.23501, 571.23836,<br>572.24172            | 563.22766, 564.39600, 565.36981,<br>566.44757, 567.43848, 568.45844,<br>569.38263, 570.43817, 571.41840,<br>572.42426 |
| Z <sub>5</sub> /Z <sub>6</sub> | 741.24935, 724.25271, 743.24731,<br>744.25066, 745.25402, 746.25737,<br>747.25826, 748.26162, 749.26497,<br>750.26586, 751.26922 | 741.25061, 742.94446                                                                                                  |

Table 2S. Standard Jaspamide (1) and their corresponding peak area calculated by HPLC

| Standard Jaspamide, µg/mL | Retention Time, R <sub>t</sub> / min<br>Jaspamide UV_VIS_280 nm | Peak Area/ mAU<br>Jaspamide UV_VIS_280 nm |
|---------------------------|-----------------------------------------------------------------|-------------------------------------------|
| 25                        | 30.367                                                          | 5.1120                                    |
| 50                        | 30.363                                                          | 10.2764                                   |
| 75                        | 30.363                                                          | 13.0962                                   |
| 100                       | 30.363                                                          | 18.6352                                   |

Table 3S. Percentage of Jaspamide (1) in JDH-2, JDE-3 and JDM-1

| Description | Retention Time, R <sub>t</sub> / min | Peak area/mAU | Concentration of Jaspamide, µg/mL | Dilution factor | Mass of Jaspamide, µg | Mass of Jaspamide, mg | Mass of sample used/mg | % Jaspamide |
|-------------|--------------------------------------|---------------|-----------------------------------|-----------------|-----------------------|-----------------------|------------------------|-------------|
| JDH-2       | 30.3270                              | 4.4538        | 23.9452                           | 1               | 23.9452               | 0.0239                | 3.2                    | 0.75        |
| JDH-2       | 30.3230                              | 3.6718        | 19.7409                           | 1               | 19.7409               | 0.0197                | 3.2                    | 0.62        |
| JDH-2       | 30.3200                              | 2.5510        | 13.7151                           | 1               | 13.7151               | 0.0137                | 3.2                    | 0.43        |
| JDE-3       | 30.4130                              | 13.3652       | 71.8560                           | 20              | 1437.1194             | 1.4371                | 3.9                    | 36.85       |
| JDE-3       | 30.4130                              | 13.1368       | 70.6280                           | 20              | 1412.5591             | 1.4126                | 3.9                    | 36.22       |
| JDE-3       | 30.4130                              | 12.8374       | 69.0181                           | 20              | 1380.3624             | 1.3804                | 3.9                    | 35.39       |
| JDM-1       | 30.4230                              | 0.6075        | 3.2661                            | 1               | 3.2661                | 0.0033                | 5.6                    | 0.06        |
| JDM-1       | 30.4270                              | 0.4028        | 2.1656                            | 1               | 2.1656                | 0.0022                | 5.6                    | 0.04        |
| JDM-1       | 30.4330                              | 0.2584        | 1.3892                            | 1               | 1.3892                | 0.0014                | 5.6                    | 0.02        |

Table 4S. Inter-day HPLC-analysis (sample solution analyzed (JC-1P) 6 times inter-day to determine the repeatability)

| Description | Retention Time, Rt / min | Peak area/mAU | Concentration of Jaspamide, µg/mL | Dilution factor | Mass of Jaspamide, µg | Mass of Jaspamide, mg | Mass of sample used/mg | % Purity | % Mean purity | SD   | %RSD |
|-------------|--------------------------|---------------|-----------------------------------|-----------------|-----------------------|-----------------------|------------------------|----------|---------------|------|------|
| Pure JP     | 30.4200                  | 4.9685        | 26.7125                           | 10              | 267.1247              | 0.2671                | 0.3                    | 89.04    | 87.54         | 1.61 | 1.84 |
| Pure JP     | 30.4200                  | 4.9441        | 26.5811                           | 10              | 265.8108              | 0.2658                | 0.3                    | 88.60    |               |      |      |
| Pure JP     | 30.4200                  | 4.9014        | 26.3517                           | 10              | 263.5167              | 0.2635                | 0.3                    | 87.84    |               |      |      |
| Pure JP     | 30.4230                  | 4.9401        | 26.5597                           | 10              | 265.5968              | 0.2656                | 0.3                    | 88.53    |               |      |      |
| Pure JP     | 30.4200                  | 4.8217        | 25.9231                           | 10              | 259.2312              | 0.2592                | 0.3                    | 86.41    |               |      |      |
| Pure JP     | 30.4230                  | 4.7341        | 25.4520                           | 10              | 254.5204              | 0.2545                | 0.3                    | 84.84    |               |      |      |

Table 5S. Intra-day HPLC-analysis (sample solution was analysed for 3 consecutive days to determine the reproducibility).

| Description | Retention Time, Rt / min | Peak area/mAU | Concentration of Jaspamide, µg/mL | Dilution factor | Mass of Jaspamide, µg | Concentration of Jaspamide, mg | Mass of sample used/mg | % Purity | % Mean purity | SD   | %RSD |
|-------------|--------------------------|---------------|-----------------------------------|-----------------|-----------------------|--------------------------------|------------------------|----------|---------------|------|------|
| Pure JP     | 30.4200                  | 4.9449        | 26.5853                           | 10              | 265.8532              | 0.2659                         | 0.3                    | 88.62    | 87.80         | 0.71 | 0.81 |
| Pure JP     | 30.4200                  | 4.8785        | 26.2286                           | 10              | 262.2860              | 0.2623                         | 0.3                    | 87.43    |               |      |      |
| Pure JP     | 30.4230                  | 4.8741        | 26.2047                           | 10              | 262.0473              | 0.2620                         | 0.3                    | 87.35    |               |      |      |
